# Supplementary material for: Socket Shield Technique to Improve the Outcomes of Immediate Implant: A Systematic Review and Meta-Analysis
Source: MDPI journal article supplement (doi:10.3390/prosthesis5020035), 2023-05-22
Supplement: s1 [file s1]

Archive with 1 entries (1 files):
- prosthesis-2304794-supplementary.pdf
