# Supplementary material for: Socket Shield Technique to Improve the Outcomes of Immediate Implant: A Systematic Review and Meta-Analysis
Source: MDPI journal article supplement (doi:10.3390/prosthesis5020035), 2023-05-22
Supplement: s1 [file s1 › prosthesis-2304794-supplementary.pdf]

**Appendix Table S1:** Search strategies (Until April 4, 2023)

|                              |                                                                                                                                                                                                                                                                                                                                                                                                                                                                                                                                                                                                                                                                                                                                                                                                                                             |
|------------------------------|---------------------------------------------------------------------------------------------------------------------------------------------------------------------------------------------------------------------------------------------------------------------------------------------------------------------------------------------------------------------------------------------------------------------------------------------------------------------------------------------------------------------------------------------------------------------------------------------------------------------------------------------------------------------------------------------------------------------------------------------------------------------------------------------------------------------------------------------|
| Scopus<br>(n= 2,805)         | TITLE-ABS-KEY("Immediate Dental Implant Loading" OR "Early Dental Implant Loading" OR "Dental Implant Loading" OR "Socket-Shield Technique" OR "Socket Shield Technique" OR "Partial Extraction" OR "Partial Root Retention" OR "Ridge Preservation" OR "Tooth Root" OR "Root Membrane") AND TITLE-ABS-KEY("Dental Implant" OR "Immediate Implant" OR "Dental Implantation" OR "Dental Implant Therapy" OR "Dental Prosthesis Implantation" OR "Surgical Dental Prosthesis" OR "Surgical Dental Prostheses")                                                                                                                                                                                                                                                                                                                                |
| PubMed<br>(n= 2,555)         | <b>#3: #1 AND #2</b><br>#1: "Immediate Dental Implant Loading"[MeSH Terms] OR "Immediate Dental Implant Loading"[All Fields] OR "Early Dental Implant Loading"[All Fields] OR "Dental Implant Loading"[All Fields] OR "socket shield technique"[All Fields] OR "socket shield technique"[All Fields] OR "Partial Extraction"[All Fields] OR "Ridge Preservation"[All Fields] OR "Tooth Root"[All Fields] OR "Root Membrane"[All Fields]<br>#2: "Dental Implants"[MeSH Terms] OR "dental implants, single tooth"[MeSH Terms] OR "Dental Implant"[All Fields] OR "Immediate Implant"[All Fields] OR "Dental Implantation"[All Fields] OR "Dental Implant Therapy"[All Fields] OR "Dental Prosthesis Implantation"[All Fields] OR "Surgical Dental Prosthesis"[All Fields] OR ("Dental Implants"[MeSH Terms] OR "Dental Implants"[All Fields]) |
| Embase<br>(n= 2,453)         | <b>#4: #1 AND #2 AND #3</b><br>#1: 'Immediate Dental Implant Loading'/de OR 'Immediate Dental Implant Loading'/exp OR 'Early Dental Implant Loading'/exp OR 'Dental Implant Loading'/exp OR 'Socket-Shield Technique'/exp OR 'Socket Shield Technique'/exp OR 'Partial Extraction'/exp OR 'Partial Root Retention'/exp OR 'Ridge Preservation'/exp OR 'Tooth Root'/exp OR 'Root Membrane'/exp<br>#2: 'Dental Implants'/de OR 'Dental Implants, Single-Tooth'/de OR 'Dental Implant'/exp OR 'Immediate Implant'/exp OR 'Dental Implantation'/exp OR 'Dental Implant Therapy'/exp OR 'Dental Prosthesis Implantation'/exp OR 'Surgical Dental Prosthesis'/exp OR 'Surgical Dental Prostheses'/exp<br>#3: 'randomized controlled trial'/de OR 'clinical trial'/de OR 'controlled clinical trial'/de                                            |
| Cochrane Library<br>(n= 439) | <b>#5: (#1 OR #2) AND (#3 OR #4)</b><br>#1: MeSH descriptor: [Immediate Dental Implant Loading] explode all trees<br>#2: "Immediate Dental Implant Loading" OR "Early Dental Implant Loading" OR "Dental Implant Loading" OR "Socket-Shield Technique" OR "Socket Shield Technique" OR "Partial Extraction" OR "Partial Root Retention" OR "Ridge Preservation" OR "Tooth Root" OR "Root Membrane"<br>#3: MeSH descriptor: [Dental Implants] explode all trees<br>#4: "Dental Implant" OR "Immediate Implant" OR "Dental Implantation" OR "Dental Implant Therapy" OR "Dental Prosthesis Implantation" OR "Surgical Dental Prosthesis" OR "Surgical Dental Prostheses"                                                                                                                                                                      |
| Web of Science<br>(n= 350)   | <b>#4: #1 AND #2 AND #3</b><br>#1: TS=("Immediate Dental Implant Loading") OR TS=("Early Dental Implant Loading") OR TS=("Dental Implant Loading") OR TS=("Socket-Shield Technique") OR TS=("Socket Shield Technique") OR TS=("Partial Extraction") OR TS=("Partial Root Retention") OR TS=("Ridge Preservation") OR TS=("Tooth Root") OR TS=("Root Membrane")<br>#2: TS=("Dental Implant") OR TS=("Immediate Implant") OR TS=("Dental Implantation") OR TS=("Dental Implant Therapy") OR TS=("Dental Prosthesis Implantation") OR TS=("Surgical Dental Prosthesis") OR TS=("Surgical Dental Prostheses")<br>#3: TS=("Controlled Clinical Trial") OR TS=("Randomized Clinical Trial") OR TS=("Randomized Controlled Clinical Trial") OR TS=("Clinical Trial")                                                                               |
| ProQuest<br>(n= 51)          | ABSTRACT("Immediate Dental Implant Loading" OR "Early Dental Implant Loading" OR "Dental Implant Loading" OR "Socket-Shield Technique" OR "Socket Shield Technique" OR "Partial Extraction" OR "Partial Root Retention" OR "Ridge Preservation" OR "Tooth Root" OR "Root Membrane") AND ABSTRACT("Dental Implant" OR "Immediate Implant" OR "Dental Implantation" OR "Dental Implant Therapy" OR "Dental Prosthesis Implantation" OR "Surgical Dental Prosthesis" OR "Surgical Dental Prostheses")                                                                                                                                                                                                                                                                                                                                          |
| EBSCOhost<br>(n= 14)         | AB("Immediate Dental Implant Loading" OR "Early Dental Implant Loading" OR "Dental Implant Loading" OR "Socket-Shield Technique" OR "Socket Shield Technique" OR "Partial Extraction" OR "Partial Root Retention" OR "Ridge Preservation" OR "Tooth Root" OR "Root Membrane") AND AB("Dental Implant" OR "Immediate Implant" OR "Dental Implantation" OR "Dental Implant Therapy" OR "Dental Prosthesis Implantation" OR "Surgical Dental Prosthesis" OR "Surgical Dental Prostheses")                                                                                                                                                                                                                                                                                                                                                      |
| Clinical trials<br>(n= 17)   | "Dental Implant" OR "Immediate Implant"   "Socket Shield" OR "Socket-Shield"                                                                                                                                                                                                                                                                                                                                                                                                                                                                                                                                                                                                                                                                                                                                                                |
| ICTRP<br>(n= 2)              | <b>in the Title:</b> ("Controlled Clinical Trial" OR "Randomized Clinical Trial" OR "Randomized Controlled Clinical Trial" OR "Clinical Trial") <b>AND in the Condition:</b> ("Dental Implant" OR "Immediate Implant" OR "Dental Implantation" OR "Dental Implant Therapy" OR "Dental Prosthesis Implantation" OR "Surgical Dental Prosthesis" OR "Surgical Dental Prostheses") <b>AND in the Intervention:</b> ("Immediate Dental Implant Loading" OR "Early Dental Implant Loading" OR "Dental Implant Loading" OR "Socket-Shield Technique" OR "Socket Shield Technique" OR "Partial Extraction" OR "Partial Root Retention" OR "Ridge Preservation" OR "Tooth Root" OR "Root Membrane")                                                                                                                                                 |

**Appendix Table S2:** Excluded studies after the full-text screening (n= 68)

| Study                       | Title                                                                                                                                                          | DOI                              | Reason for exclusion    |
|-----------------------------|----------------------------------------------------------------------------------------------------------------------------------------------------------------|----------------------------------|-------------------------|
| Hürzeler et al. (2010)      | The socket-shield technique: a proof-of-principle report.                                                                                                      | 10.1111/j.1600-051X.2010.01595.x | Animal study            |
| Chen et al. (2013)          | Socket shield technique for ridge preservation: A case report.                                                                                                 | 10.6926/JPI.201312_2(2).0003     | Case report             |
| Kan et al. (2013)           | Proximal socket shield for interimplant papilla preservation in the esthetic zone.                                                                             | 10.11607/prd.1346                | Literature review       |
| Viña-Almunia et al. (2013)  | Buccal bone crest dynamics after immediate implant placement and ridge preservation techniques: Review of morphometric studies in animals.                     | 10.1097/ID.0b013e318287a947      | Literature review       |
| Abadzhev et al. (2014)      | Conventional immediate implant placement and immediate placement with socket-shield technique – which is better.                                               | NA                               | Non-randomized trial    |
| Cherel et al. (2014)        | Papilla preservation between two implants: A modified socket-shield technique to maintain the scalloped anatomy? A case report.                                | 10.3290/j.qi.a30765              | Case report             |
| Glocker et al. (2014)       | Ridge preservation with modified “socket-shield” technique: a methodological case series.                                                                      | 10.3390/dj2010011                | Case series             |
| Kotsakis et al. (2014)      | Flapless alveolar ridge preservation utilizing the “socketplug” technique: clinical technique and review of the literature.                                    | 10.1563/AAID-JOJD-12-00028       | Literature review       |
| Siormpas et al. (2014)      | Immediate implant placement in the esthetic zone utilizing the “root-membrane” technique: clinical results up to 5 years postloading.                          | 10.11607/jomi.3707               | Case series             |
| Troiano et al. (2014)       | Bundle bone preservation with Root-T-Belt: Case study.                                                                                                         | NA                               | Case report             |
| Al Dary et al. (2015)       | The socket shield technique using bone trephine: a case report.                                                                                                | NA                               | Case report             |
| Bäumer et al. (2015)        | The Socket-Shield Technique: First Histological, Clinical, and Volumetrical Observations after Separation of the Buccal Tooth Segment – A Pilot Study          | 10.1111/cid.12076                | Animal study            |
| Gluckman et al. (2015)      | The management of recession midfacial to immediately placed implants in the aesthetic zone.                                                                    | NA                               | Case series             |
| Gluckman et al. (2015)      | The socket-shield technique to support the buccofacial tissues at immediate implant placement.                                                                 | NA                               | Case report             |
| Mitsias et al. (2015)       | A step-by-step description of pdl mediated ridge preservation for immediate implant rehabilitation in the esthetic region.                                     | NA                               | Case report             |
| Wadhwani et al. (2015)      | Socket shield technique: a new concept of ridge preservation.                                                                                                  | NA                               | Case report             |
| Abitbol et al. (2016)       | Implant insertion after tooth extraction: Clinical outcomes with different approaches (including socket preservation, immediate, early and delayed placement). | NA                               | Full-text not available |
| Al Dary et al. (2016)       | Socket shield technique with and without implant placement to maintain pink aesthetics: case report                                                            | NA                               | Case report             |
| Calvo-Guirado et al. (2016) | Different configuration of socket shield technique in peri-implant bone preservation: an experimental study in dog mandible.                                   | 10.1016/j.aanat.2016.06.008      | Animal study            |
| Chen et al. (2016)          | A preliminary clinical study of buccal bone alteration using the socket-shield technique and immediate implant placement.                                      | NA                               | Case report             |
| Gluckman et al. (2016)      | Partial extraction therapies (PET) Part 1: maintaining alveolar ridge contour at pontic and immediate implant sites                                            | 10.11607/prd.2783                | Literature review       |
| Bäumer et al. (2017)        | Socket Shield Technique for immediate implant placement – clinical, radiographic and volumetric data after 5 years                                             | 10.1111/clr.13012                | Case series             |
| Gharpure et al. (2017)      | Current evidence on the socket-shield technique: a systematic review.                                                                                          | 10.1563/aaid-joi-D-17-00118      | Systematic review       |
| Gluckman et al. (2017)      | A retrospective evaluation of 128 socket-shield cases in the esthetic zone and posterior sites: Partial extraction therapy with up to 4 years follow-up.       | 10.1111/cid.12554                | Retrospective design    |
| Gluckman et al. (2017)      | Partial extraction therapies (PET) Part 2: procedures and technical aspects                                                                                    | 10.11607/prd.3111                | Literature review       |

|                             |                                                                                                                                                                                |                                          |                         |
|-----------------------------|--------------------------------------------------------------------------------------------------------------------------------------------------------------------------------|------------------------------------------|-------------------------|
| Huang et al. (2017)         | Immediate implants combined with modified socket-shield technique: a case letter.                                                                                              | 10.1563/aaid-joi-D-16-00107              | Case report             |
| Mitsias et al. (2017)       | The root membrane technique: human histologic evidence after five years of function.                                                                                           | 10.1155/2017/7269467                     | Case report             |
| Petsch et al. (2017)        | Socket Shield Technique for Implant Placement in the Esthetic Zone: A Case Report.                                                                                             | 10.11607/prd.2729                        | Case report             |
| Roe et al. (2017)           | Residual root preparation for socketshield procedures: a facial window approach.                                                                                               | PMID:28717791                            | Literature review       |
| Saeidi Pour et al. (2017)   | Clinical benefits of the immediate implant socket shield technique.                                                                                                            | 10.1111/jerd.12291                       | Case report             |
| Abdullatif (2018)           | 3-dimensional volumetric analysis of double socketshield for maximum tissue preservation at immediate implant replacement of multi-rooted teeth, a case report.                | 10.12691/ijdsr-6-3-2                     | Case report             |
| Aslan (2018)                | Improved volume and contour stability with thin socket-shield preparation in immediate implant placement and provisionalization in the esthetic zone                           | PMID: 29687096                           | Case report             |
| Dayakar et al. (2018)       | The socket-shield technique and immediate implant placement.                                                                                                                   | 10.4103/jisp.jisp_240_18                 | Case report             |
| Dohiem et al. (2018)        | Immediate implant placement in canine region using root membrane technique with follow up 2 years case report.                                                                 | 10.1016/j.fdj.2018.01.002                | Case report             |
| Esteve-Pardo et al. (2018)  | Clinical application of the socket-shield concept in multiple anterior teeth.                                                                                                  | 10.1155/2018/9014372                     | Case report             |
| Guo et al. (2018)           | Tissue preservation through socket-shield technique and plateletrich fibrin in immediate implant placement: A case report.                                                     | 10.1097/MD.00000000000013175             | Case report             |
| Han et al. (2018)           | The Modified Socket Shield Technique.                                                                                                                                          | 10.1097/SCS.00000000000004494            | Case series             |
| Hinze et al. (2018)         | Volumetric alterations around single-tooth implants using the socket-shield technique: Preliminary results of a prospective case series.                                       | PMID: 29687095                           | Case series             |
| Mattiola et al. (2018)      | The rigid-shield technique: a new contour and clot stabilizing method for ridge preservation.                                                                                  | 10.3390/dj6020021                        | Case report             |
| Mujawar et al. (2018)       | Socket shield technique: a review.                                                                                                                                             | NA                                       | Literature review       |
| Pal et al. (2018)           | The socket shield technique.                                                                                                                                                   | NA                                       | Full-text not available |
| Siormpas et al. (2018)      | The root membrane technique: a retrospective clinical study with up to 10 years of follow-up.                                                                                  | 10.1097/ID.00000000000000818             | Retrospective design    |
| Tan et al. (2018)           | The effect of the heights and thicknesses of the remaining root segments on buccal bone resorption in the socket-shield technique: an experimental study in dogs.              | 10.1111/cid.12588                        | Animal study            |
| Verma et al. (2018)         | Socket shield technique—A new approach to immediate implant placement.                                                                                                         | NA                                       | Case report             |
| Zhu et al. (2018)           | Clinical evaluation of socket shield technique in maxillary anterior region.                                                                                                   | 10.3760/cma.j.issn.1002-0098.2018.10.004 | Case series             |
| Arabbi et al. (2019)        | Socket shield: a case report.                                                                                                                                                  | 10.4103/jpbs.JPBS_228_18                 | Case report             |
| Calvo-Guirado et al. (2019) | Socket-shield technique: the influence of the length of the remaining buccal segment of healthy tooth structure on peri-implant bone and socket preservation. A study in dogs. | 10.1016/j.aanat.2018.09.003              | Animal study            |
| Mourya et al. (2019)        | Socket-shield technique for implant placement to stabilize the facial gingival and osseous architecture: a systematic review.                                                  | 10.1111/jicd.12449                       | Systematic review       |
| Schwimer et al. (2019)      | The socket-shield technique at molar sites: a proof-of-principle technique report.                                                                                             | 10.1016/j.prosdent.2018.05.006           | Literature review       |
| Xu et al. (2019)            | Comparison of clinical effects of a modified socket shield technique and the conventional immediate implant placement                                                          | 10.7518/hxkq.2019.05.007                 | Non-English study       |
| Zhang et al. (2019)         | Effect of socket-shield technique on alveolar ridge soft and hard tissue in dogs.                                                                                              | 10.1111/jcpe.13073                       | Animal study            |

|                            |                                                                                                                                                                                       |                                      |                      |
|----------------------------|---------------------------------------------------------------------------------------------------------------------------------------------------------------------------------------|--------------------------------------|----------------------|
| BinLihua et al. (2020)     | Short-term effect comparison of a modified socket shield technique and conventional flapless immediate implant and immediate restoration in maxillary aesthetic area                  | 10.3969/j.issn.2095-4344.2344        | Non-English study    |
| Blaschke et al. (2020)     | The socket-shield technique: a critical literature review.                                                                                                                            | 10.1186/s40729-020-00246-2           | Literature review    |
| Gandhi et al. (2020)       | Inappropriate socket shield protocol as a probable cause of peri-implant bone resorption: a case report.                                                                              | 10.1007/s12663-019-01301-1           | Case report          |
| Mathew et al. (2020)       | Comparative Evaluation of Socket Shield and Immediate Implant Placement                                                                                                               | NA                                   | Non-randomized trial |
| Mitsias et al. (2020)      | Root Membrane Group Longitudinal Soft Tissue Changes During Periodontal Ligament-Mediated Immediate Implant Placement with the Root-Membrane Technique.                               | 10.11607/jomi.7245                   | Case series          |
| Nguyen et al. (2020)       | Socket shield technique used in conjunction with immediate implant placement in the anterior maxilla: a case series.                                                                  | 10.1002/cap.10087                    | Case series          |
| Staehler et al. (2020)     | The socket-shield technique: A step-by-step protocol after 12 years of experience.                                                                                                    | PMID: 32760924                       | Case report          |
| Zuhr et al. (2020)         | Complication Management of a Socket Shield Case After 6 Years of Function.                                                                                                            | 10.11607/prd.4648                    | Case report          |
| Atieh et al. (2021)        | The socket shield technique for immediate implant placement: A systematic review and meta-analysis.                                                                                   | 10.1111/jerd.12812                   | Systematic review    |
| Bohórquez et al. (2021)    | Failure Rate, Marginal Bone Loss, and Pink Esthetic with Socket-Shield Technique for Immediate Dental Implant Placement in the Esthetic Zone. A Systematic Review and Meta-Analysis   | 10.3390/biology10060549              | Systematic review    |
| De Angelis et al. (2021)   | Immediate Implants in the Aesthetic Zone: Is Socket Shield Technique a Predictable Treatment Option? A Narrative Review                                                               | 10.3390/jcm10214963                  | Literature review    |
| de Oliveira et al. (2021)  | Evaluation of alveolar process resorption after tooth extraction using the socket shield technique without immediate installation of implants: a randomised controlled clinical trial | 10.1016/j.bjoms.2021.04.001          | Irrelevant outcome   |
| Sáez-Alcaide et al. (2021) | Socket shield technique: A systematic review of human studies                                                                                                                         | 10.1016/j.aanat.2021.151779          | Systematic review    |
| Yunbin Li (2021)           | Comparison of modified shield technique and traditional immediate implant in the treatment of patients with single dental implant in maxillary esthetic area.                         | 10.3969/j.issn.1672-0369.2021.08.054 | Non-English study    |
| Gómez-Meda et al. (2022)   | Dimensional Changes in the Alveolus after a Combination of Immediate Postextraction Implant and Connective Grafting and/or Socket Shield Technique                                    | 10.3390/ijerph19052795               | Cohort study         |
| Ogawa et al. (2022)        | Effectiveness of the socket shield technique in dental implant: A systematic review                                                                                                   | 10.2186/jpr.JPR_D_20_00054           | Systematic review    |
| Zhang et al. (2022)        | Could the socket shield technique be better than conventional immediate implantation? A meta-analysis                                                                                 | 10.1007/s00784-021-04266-z           | Systematic review    |

**Appendix Table S3: Results of all outcomes during follow-ups**

| Study                           | Horizontal bone loss<br>(Changes in buccal bone width) (mm) |              | Vertical bone loss<br>(Changes in buccal bone height) (mm) |             | Implant Stability Quotient (ISQ) |              | Pink Esthetic Score (PES) |              | Crestal bone loss<br>(Changes in marginal bone levels) (mm) |             | Probing depth |             | Dropouts n (%) |        | Complications n (%) |        | Implant Failure n (%) |        |
|---------------------------------|-------------------------------------------------------------|--------------|------------------------------------------------------------|-------------|----------------------------------|--------------|---------------------------|--------------|-------------------------------------------------------------|-------------|---------------|-------------|----------------|--------|---------------------|--------|-----------------------|--------|
|                                 | SST                                                         | No SST       | SST                                                        | No SST      | SST                              | No SST       | SST                       | No SST       | SST                                                         | No SST      | SST           | No SST      | SST            | No SST | SST                 | No SST | SST                   | No SST |
| At implantation                 |                                                             |              |                                                            |             |                                  |              |                           |              |                                                             |             |               |             |                |        |                     |        |                       |        |
| Barakat et al. (2017)           | NR                                                          | NR           | NR                                                         | NR          | 60.30 ± 6.43                     | 57.20 ± 9.15 | NR                        | NR           | NR                                                          | NR          | NR            | NR          | 0 (0%)         | 0 (0%) | 0 (0%)              | 0 (0%) | 0 (0%)                | 0 (0%) |
| Abdel-Raheim et al. (2019)      | NR                                                          | NR           | NR                                                         | NR          | 60.30 ± 6.43                     | 57.20 ± 9.15 | NR                        | NR           | NR                                                          | NR          | NR            | NR          | 0 (0%)         | 0 (0%) | 0 (0%)              | 0 (0%) | 0 (0%)                | 0 (0%) |
| Abd-Elrahman et al. (2020)      | NR                                                          | NR           | NR                                                         | NR          | 68.6 ± 3.81                      | 66.4 ± 5.64  | NR                        | NR           | NR                                                          | NR          | NR            | NR          | 0 (0%)         | 0 (0%) | 0 (0%)              | 0 (0%) | 0 (0%)                | 0 (0%) |
| Hana et al. (2020)              | NR                                                          | NR           | NR                                                         | NR          | NR                               | NR           | NR                        | NR           | NR                                                          | NR          | NR            | NR          | 0 (0%)         | 0 (0%) | 0 (0%)              | 0 (0%) | 0 (0%)                | 0 (0%) |
| Sun et al. (2020)               | NR                                                          | NR           | NR                                                         | NR          | 76.01 ± 1.31                     | 75.56 ± 1.07 | NR                        | NR           | NR                                                          | NR          | NR            | NR          | 0 (0%)         | 0 (0%) | 0 (0%)              | 0 (0%) | 0 (0%)                | 0 (0%) |
| Abdullah et al. (2022)          | NR                                                          | NR           | NR                                                         | NR          | 57.75 ± 13.9                     | 48.5 ± 10.6  | NR                        | NR           | NR                                                          | NR          | NR            | NR          | 0 (0%)         | 0 (0%) | 0 (0%)              | 0 (0%) | 0 (0%)                | 0 (0%) |
| After 3 months                  |                                                             |              |                                                            |             |                                  |              |                           |              |                                                             |             |               |             |                |        |                     |        |                       |        |
| Bramanti et al. (2018)          | NR                                                          | NR           | NR                                                         | NR          | NR                               | NR           | 12.5 ± 0.94               | 11.45 ± 1.6  | 0.32 ± 0.05                                                 | 0.79 ± 0.08 | NR            | NR          | 0 (0%)         | 0 (0%) | 0 (0%)              | 0 (0%) | 0 (0%)                | 0 (0%) |
| Fattouh (2018)                  | NR                                                          | NR           | NR                                                         | NR          | NR                               | NR           | 11.4 ± 0.84               | 10.6 ± 0.69  | 0.42 ± 0.14                                                 | 0.62 ± 0.12 | NR            | NR          | 0 (0%)         | 0 (0%) | 0 (0%)              | 0 (0%) | 0 (0%)                | 0 (0%) |
| After 4 months                  |                                                             |              |                                                            |             |                                  |              |                           |              |                                                             |             |               |             |                |        |                     |        |                       |        |
| Barakat et al. (2017)           | 0.05 ± 0.02                                                 | 0.22 ± 0.14  | 0.16 ± 0.13                                                | 0.86 ± 0.76 | 69.80 ± 3.77                     | 65.60 ± 5.66 | NR                        | NR           | NR                                                          | NR          | 2.05 ± 0.31   | 2.75 ± 0.70 | 0 (0%)         | 0 (0%) | 0 (0%)              | 0 (0%) | 0 (0%)                | 0 (0%) |
| Tiwari et al. (2020)            | 0.01 ± 0.00                                                 | 0.03 ± 0.02  | NR                                                         | NR          | NR                               | NR           | NR                        | NR           | NR                                                          | NR          | NR            | NR          | 0 (0%)         | 0 (0%) | 0 (0%)              | 0 (0%) | 0 (0%)                | 0 (0%) |
| Kumar et al. (2021)             | NR                                                          | NR           | NR                                                         | NR          | NR                               | NR           | 9.13 ± 1.03               | 6.87 ± 1.36  | NR                                                          | NR          | NR            | NR          | 0 (0%)         | 0 (0%) | 0 (0%)              | 0 (0%) | 0 (0%)                | 0 (0%) |
| After 6 months                  |                                                             |              |                                                            |             |                                  |              |                           |              |                                                             |             |               |             |                |        |                     |        |                       |        |
| Bramanti et al. (2018)          | NR                                                          | NR           | NR                                                         | NR          | NR                               | NR           | 12.3 ± 0.86               | 11.05 ± 1.53 | 0.54 ± 0.06                                                 | 1.02 ± 0.10 | NR            | NR          | 0 (0%)         | 0 (0%) | 0 (0%)              | 0 (0%) | 0 (0%)                | 0 (0%) |
| Fattouh (2018)                  | NR                                                          | NR           | NR                                                         | NR          | NR                               | NR           | 11.2 ± 0.91               | 10.3 ± 0.48  | 0.64 ± 0.12                                                 | 0.98 ± 0.17 | NR            | NR          | 0 (0%)         | 0 (0%) | 0 (0%)              | 0 (0%) | 0 (0%)                | 0 (0%) |
| Abdel-Raheim et al. (2019)      | 0.10 ± 0.03                                                 | 0.34 ± 0.11  | 0.44 ± 0.24                                                | 1.61 ± 0.78 | 69.80 ± 3.77                     | 65.60 ± 5.66 | NR                        | NR           | NR                                                          | NR          | NR            | NR          | 0 (0%)         | 0 (0%) | 0 (0%)              | 0 (0%) | 0 (0%)                | 0 (0%) |
| Abd-Elrahman et al. (2020)      | 0.12 ± 0.07                                                 | 0.28 ± 0.15  | 0.34 ± 0.12                                                | 0.77 ± 0.35 | 76.71 ± 3.49                     | 75.5 ± 4.4   | 12.00 ± 1.12              | 8.85 ± 1.81  | NR                                                          | NR          | NR            | NR          | 0 (0%)         | 0 (0%) | 2* (5%)             | 0 (0%) | 0 (0%)                | 0 (0%) |
| Sun et al. (2020)               | 0.22 ± 0.09                                                 | -0.53 ± 0.05 | 0.28 ± 0.08                                                | 0.87 ± 0.12 | NR                               | NR           | 12.00 ± 1.77              | 11.73 ± 1.67 | NR                                                          | NR          | NR            | NR          | 0 (0%)         | 0 (0%) | 0 (0%)              | 0 (0%) | 0 (0%)                | 0 (0%) |
| Atef et al. (2021)              | 0.29 ± 0.34                                                 | 1.45 ± 0.72  | 0.36 ± 0.62                                                | 1.71 ± 1.02 | NR                               | NR           | NR                        | NR           | NR                                                          | NR          | NR            | NR          | 0 (0%)         | 0 (0%) | 0 (0%)              | 0 (0%) | 0 (0%)                | 0 (0%) |
| Santhanakrishna n et al. (2021) | 0.05 ± 0.02                                                 | 0.4 ± 0.1    | NR                                                         | NR          | NR                               | NR           | 11.7 ± 1.8                | 11.2 ± 2.1   | NR                                                          | NR          | NR            | NR          | 0 (0%)         | 0 (0%) | 0 (0%)              | 0 (0%) | 0 (0%)                | 0 (0%) |
| Abdullah et al. (2022)          | NR                                                          | NR           | NR                                                         | NR          | 68.63 ± 7.73                     | 62.75 ± 5.70 | 12.12 ± 1.55              | 12.12 ± 1.64 | NR                                                          | NR          | NR            | NR          | 0 (0%)         | 0 (0%) | 0 (0%)              | 0 (0%) | 0 (0%)                | 0 (0%) |
| After 7 months                  |                                                             |              |                                                            |             |                                  |              |                           |              |                                                             |             |               |             |                |        |                     |        |                       |        |
| Barakat et al. (2017)           | 0.10 ± 0.03                                                 | 0.34 ± 0.11  | 0.44 ± 0.24                                                | 1.61 ± 0.78 | NR                               | NR           | NR                        | NR           | NR                                                          | NR          | 1.73 ± 0.28   | 2.12 ± 0.64 | 0 (0%)         | 0 (0%) | 0 (0%)              | 0 (0%) | 0 (0%)                | 0 (0%) |
| After 8 months                  |                                                             |              |                                                            |             |                                  |              |                           |              |                                                             |             |               |             |                |        |                     |        |                       |        |

|                        |             |             |    |    |    |    |              |              |             |             |             |             |        |        |                         |                         |        |        |
|------------------------|-------------|-------------|----|----|----|----|--------------|--------------|-------------|-------------|-------------|-------------|--------|--------|-------------------------|-------------------------|--------|--------|
| Tiwari et al. (2020)   | 0.03 ± 0.03 | 0.16 ± 0.03 | NR | NR | NR | NR | NR           | NR           | NR          | NR          | NR          | NR          | 0 (0%) | 0 (0%) | 0 (0%)                  | 0 (0%)                  | 0 (0%) | 0 (0%) |
| After 12 months        |             |             |    |    |    |    |              |              |             |             |             |             |        |        |                         |                         |        |        |
| Fattouh (2018)         | NR          | NR          | NR | NR | NR | NR | 11.1 ± 0.73  | 10.2 ± 0.42  | 0.69 ± 0.11 | 1.06 ± 0.24 | NR          | NR          | 0 (0%) | 0 (0%) | 0 (0%)                  | 0 (0%)                  | 0 (0%) | 0 (0%) |
| Hana et al. (2020)     | NR          | NR          | NR | NR | NR | NR | 12.26 ± 1.04 | 9.63 ± 1.34  | NR          | NR          | NR          | NR          | 0 (0%) | 0 (0%) | 2 <sup>b</sup><br>(10%) | 5 <sup>c</sup><br>(25%) | 0 (0%) | 0 (0%) |
| Sun et al. (2020)      | NR          | NR          | NR | NR | NR | NR | 12.20 ± 1.57 | 11.53 ± 1.73 | NR          | NR          | 1.22 ± 0.03 | 1.90 ± 0.09 | 0 (0%) | 0 (0%) | 0 (0%)                  | 0 (0%)                  | 0 (0%) | 0 (0%) |
| Tiwari et al. (2020)   | 0.03 ± 0.03 | 0.19 ± 0.01 | NR | NR | NR | NR | NR           | NR           | NR          | NR          | NR          | NR          | 0 (0%) | 0 (0%) | 0 (0%)                  | 0 (0%)                  | 0 (0%) | 0 (0%) |
| Atef et al. (2021)     | NR          | NR          | NR | NR | NR | NR | 12.12 ± 0.64 | 11.86 ± 0.35 | NR          | NR          | NR          | NR          | 0 (0%) | 0 (0%) | 0 (0%)                  | 0 (0%)                  | 0 (0%) | 0 (0%) |
| Abdullah et al. (2022) | 0.14 ± 0.63 | 0.04 ± 1.30 | NR | NR | NR | NR | 12.9 ± 1.69  | 12.38 ± 2.20 | 0.26 ± 0.52 | 0.34 ± 0.31 | NR          | NR          | 0 (0%) | 0 (0%) | 0 (0%)                  | 0 (0%)                  | 0 (0%) | 0 (0%) |
| After 24 months        |             |             |    |    |    |    |              |              |             |             |             |             |        |        |                         |                         |        |        |
| Sun et al. (2020)      | NR          | NR          | NR | NR | NR | NR | 12.07 ± 1.62 | 11.33 ± 1.76 | NR          | NR          | 1.23 ± 0.02 | 2.00 ± 0.09 | 0 (0%) | 0 (0%) | 0 (0%)                  | 0 (0%)                  | 0 (0%) | 0 (0%) |
| After 36 months        |             |             |    |    |    |    |              |              |             |             |             |             |        |        |                         |                         |        |        |
| Bramanti et al. (2018) | NR          | NR          | NR | NR | NR | NR | 12.15 ± 0.87 | 10.3 ± 1.59  | 0.61 ± 0.06 | 1.12 ± 0.13 | NR          | NR          | 0 (0%) | 0 (0%) | 0 (0%)                  | 0 (0%)                  | 0 (0%) | 0 (0%) |

**Explanations:**

- a. Internal shield exposure
- b. External and Internal shield exposure
- c. Inadequate keratinized tissue and gum recession

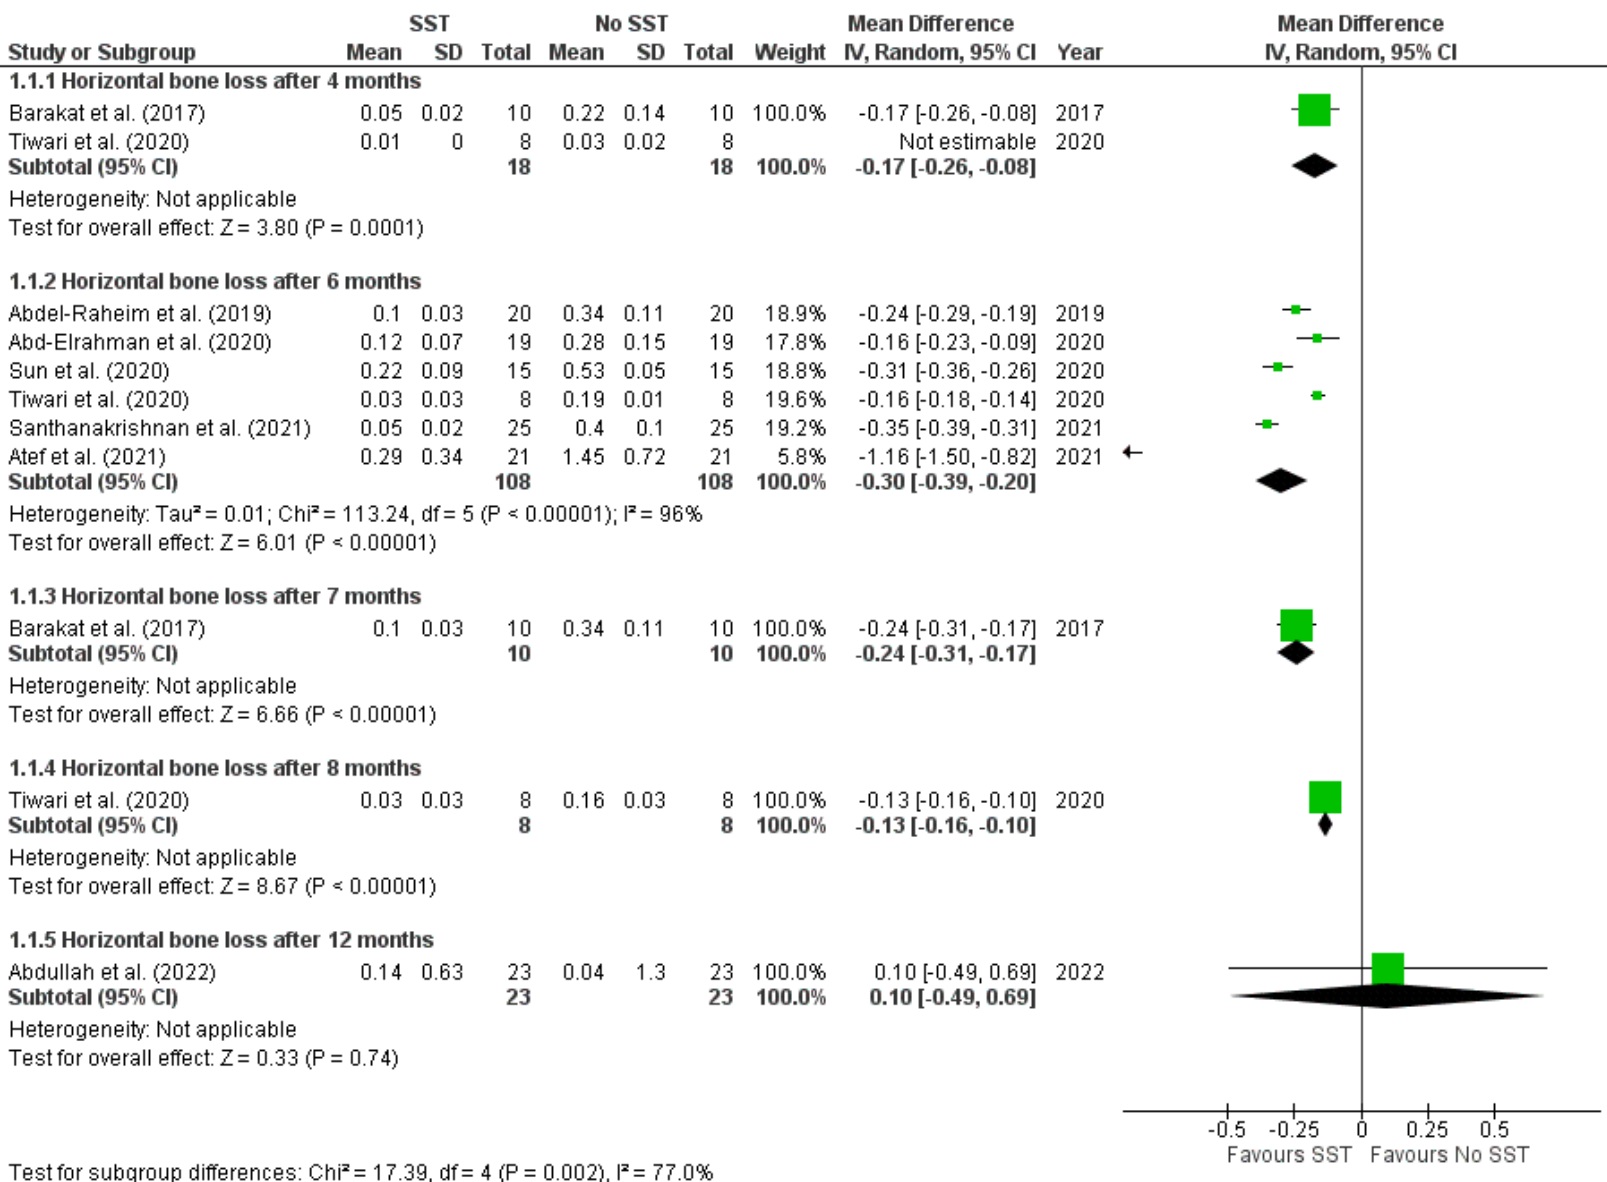

**Appendix Figure S1.** Sensitivity analysis measuring the amount of horizontal bone loss at different follow-ups

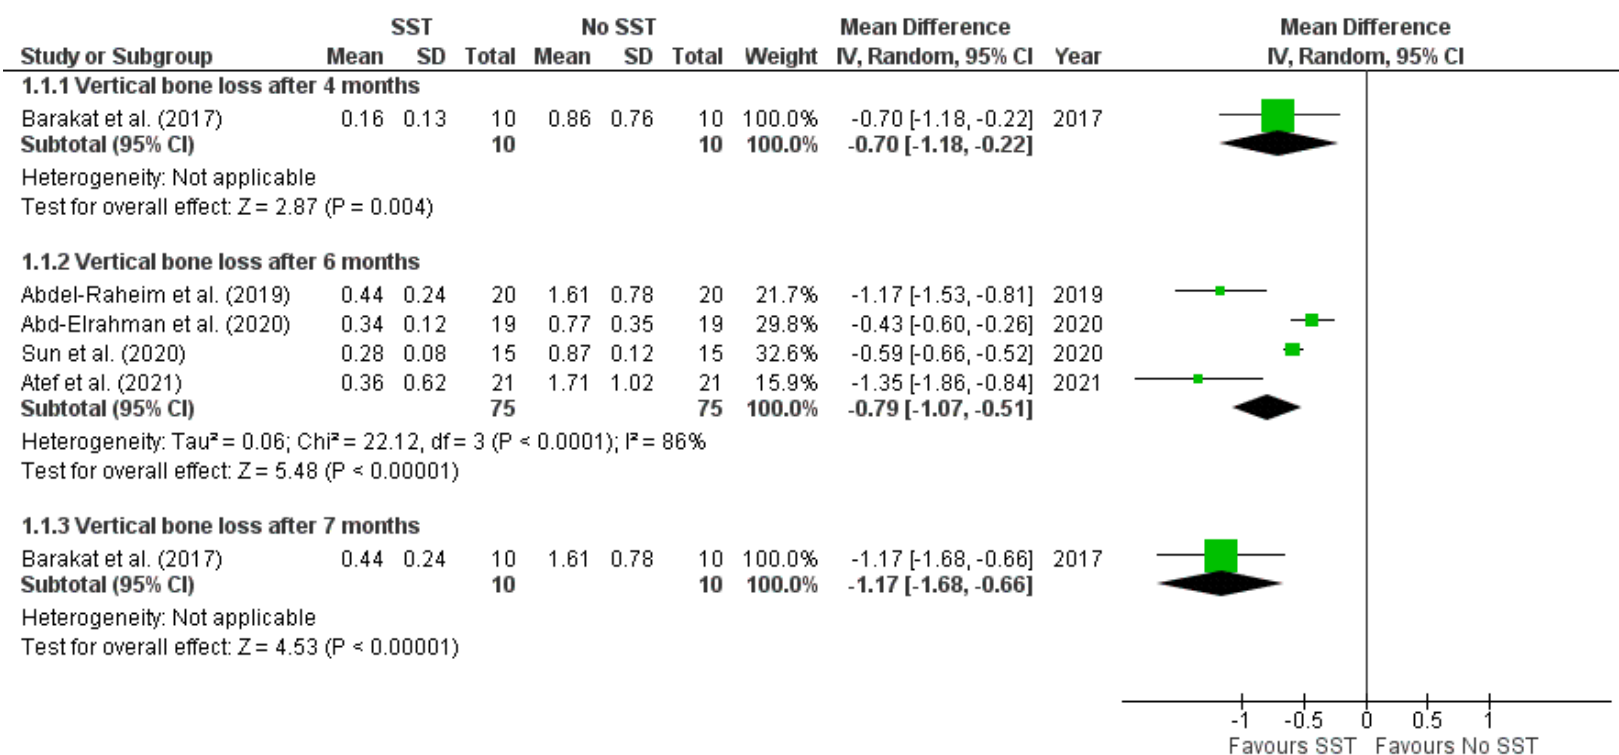

**Appendix Figure S2.** Sensitivity analysis measuring the amount of vertical bone loss at different follow-ups

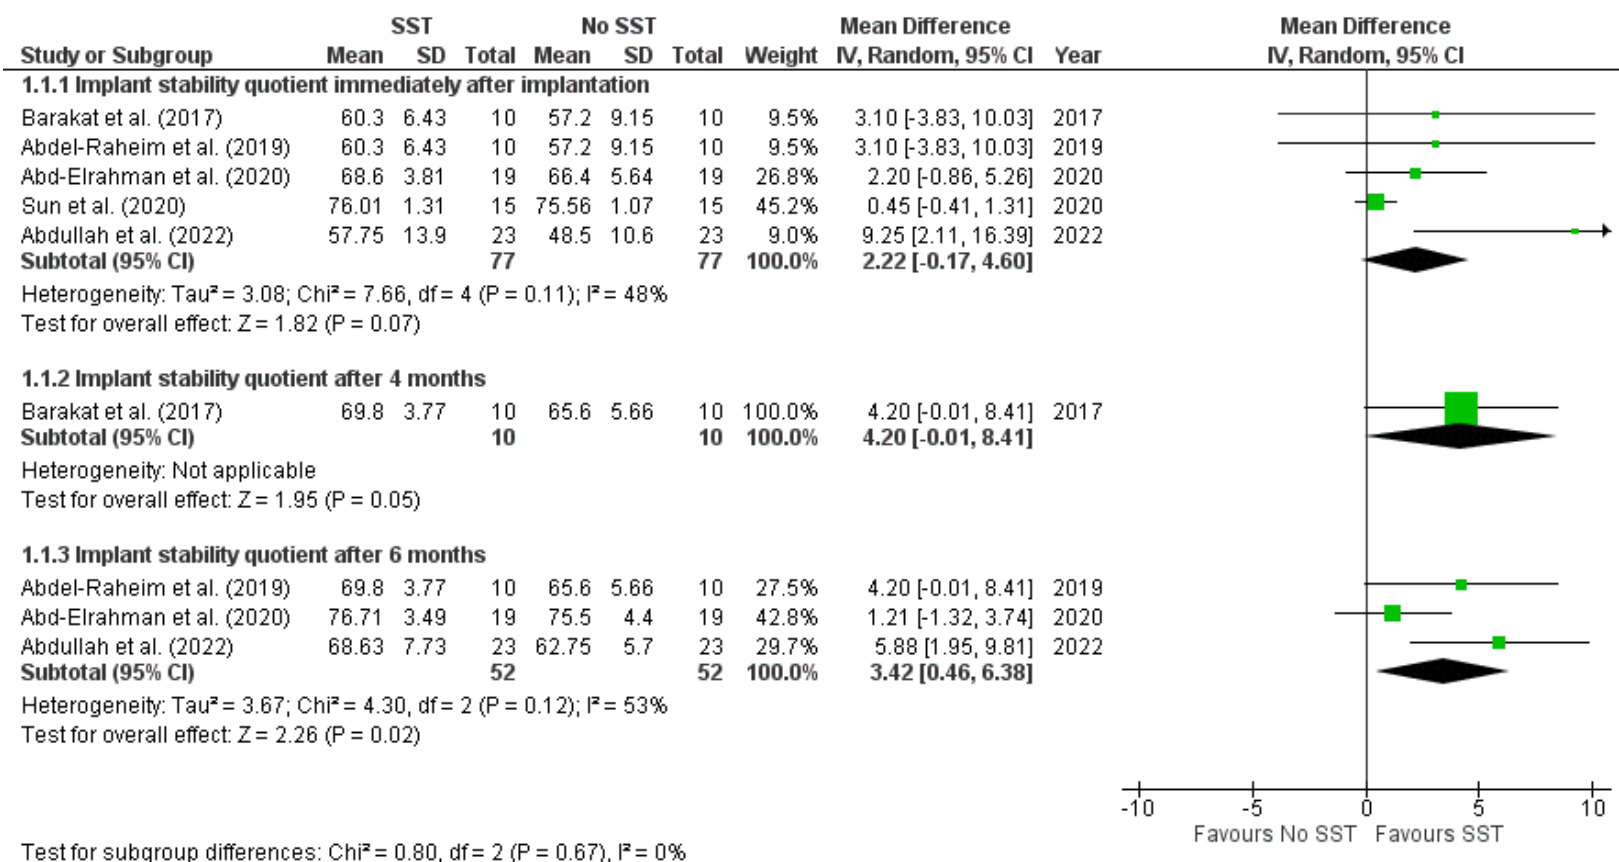

**Appendix Figure S3.** Sensitivity analysis measuring the implant stability quotient at different follow-ups

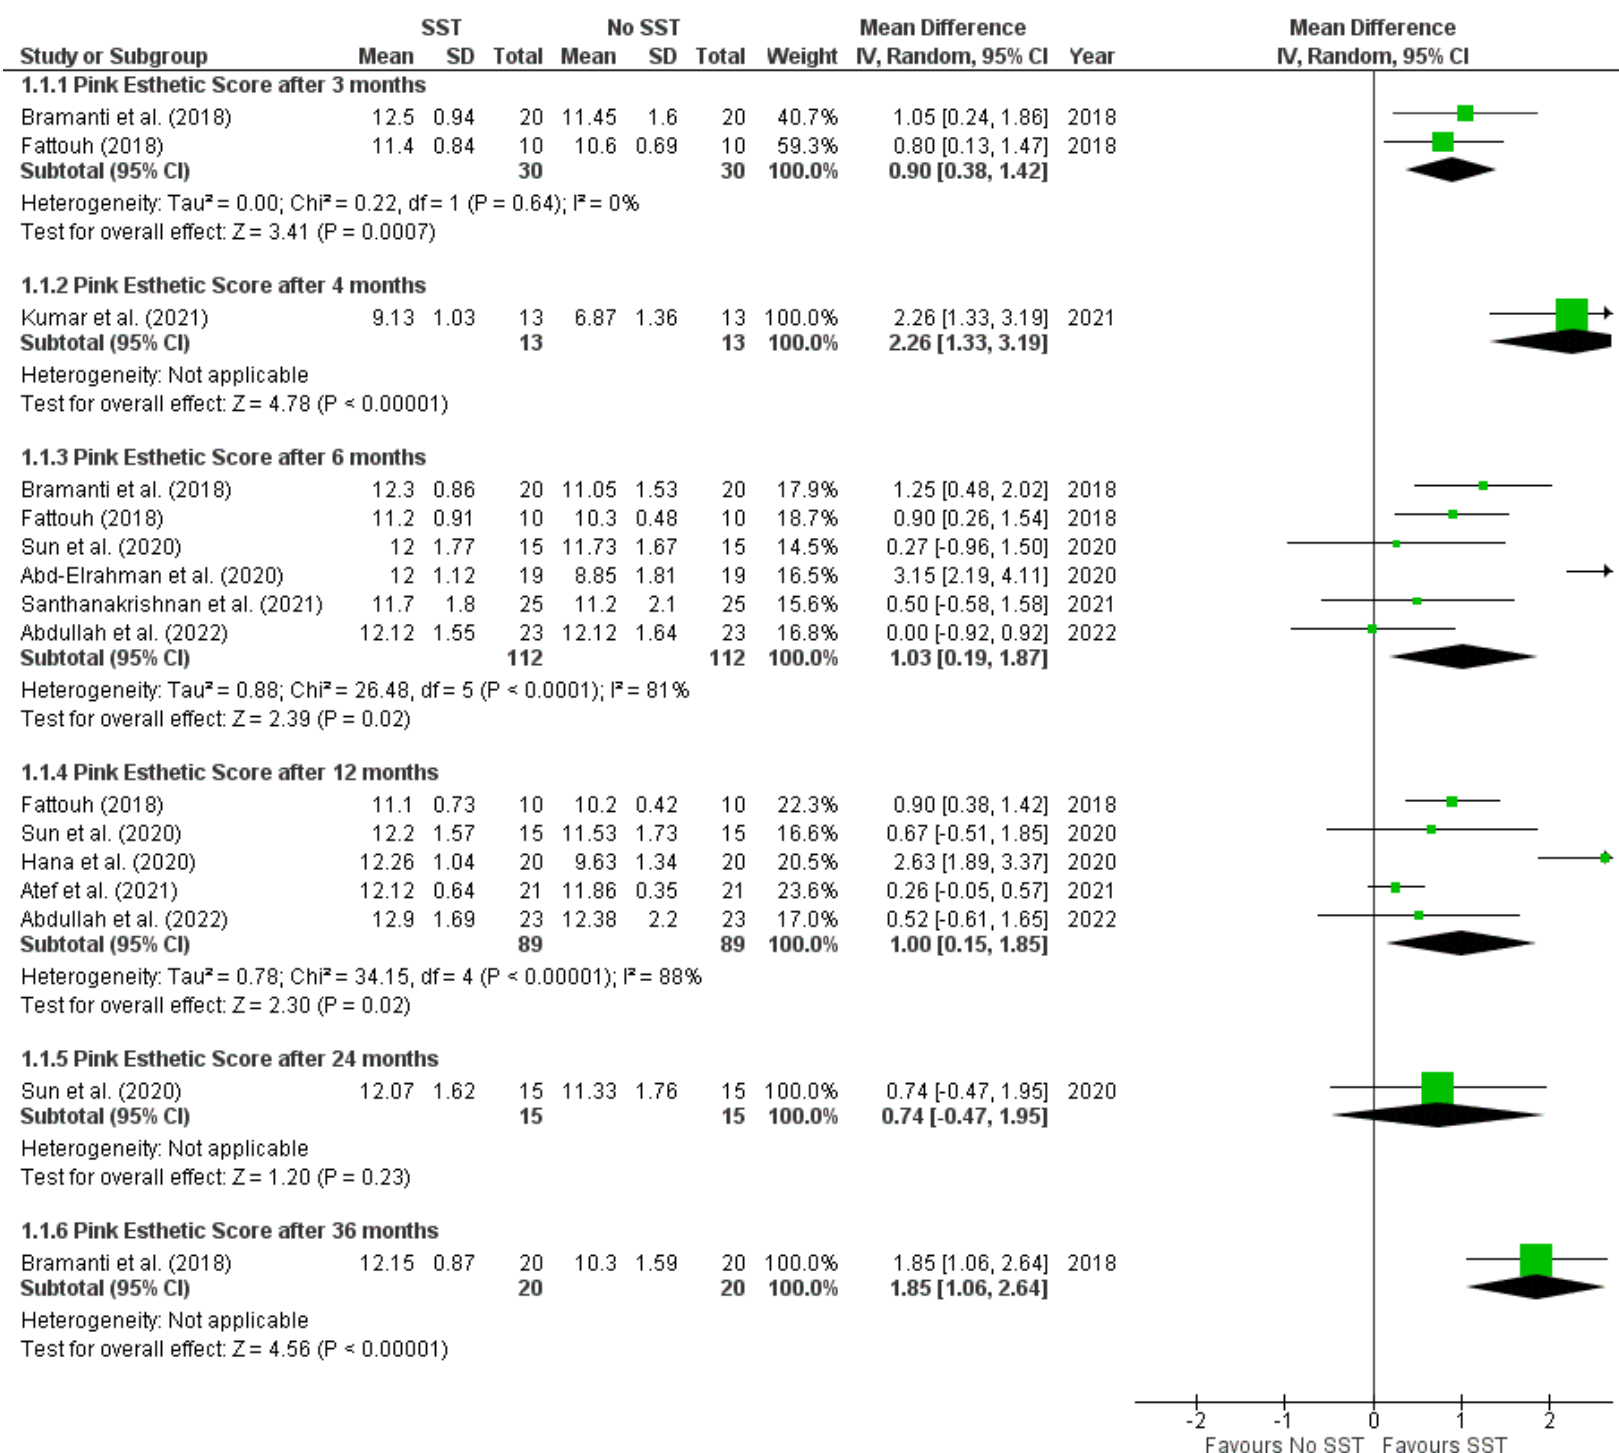

**Appendix Figure S4.** Sensitivity analysis measuring the pink esthetic score at different follow-ups

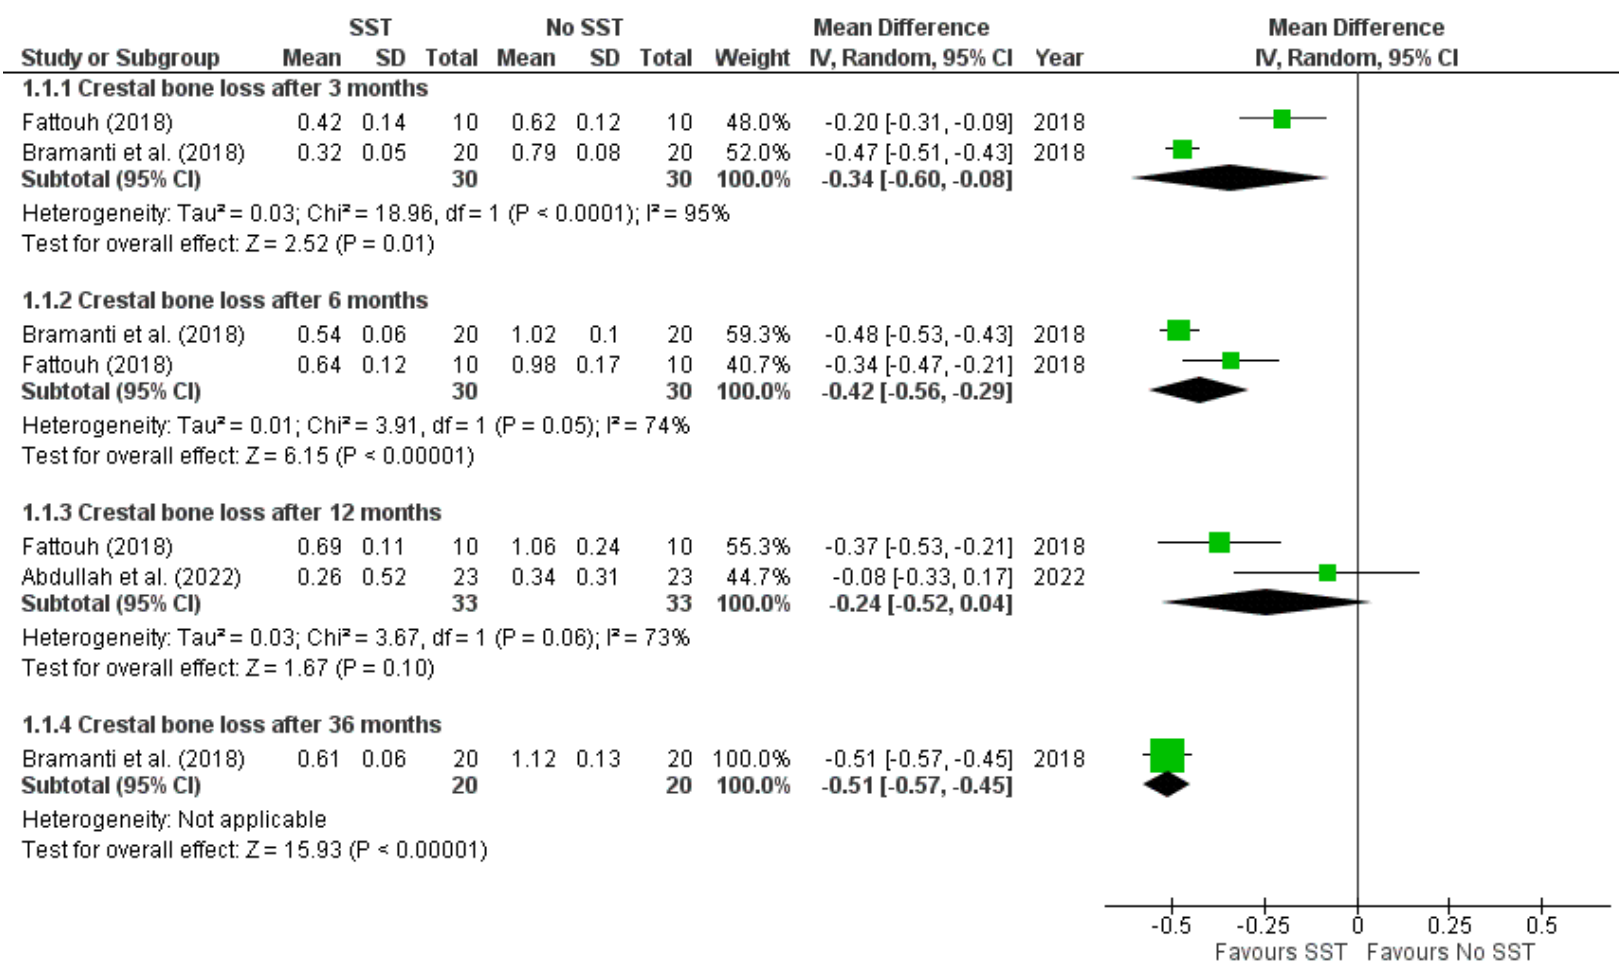

**Appendix Figure S5.** Sensitivity analysis measuring the amount of crestal bone loss at different follow-ups

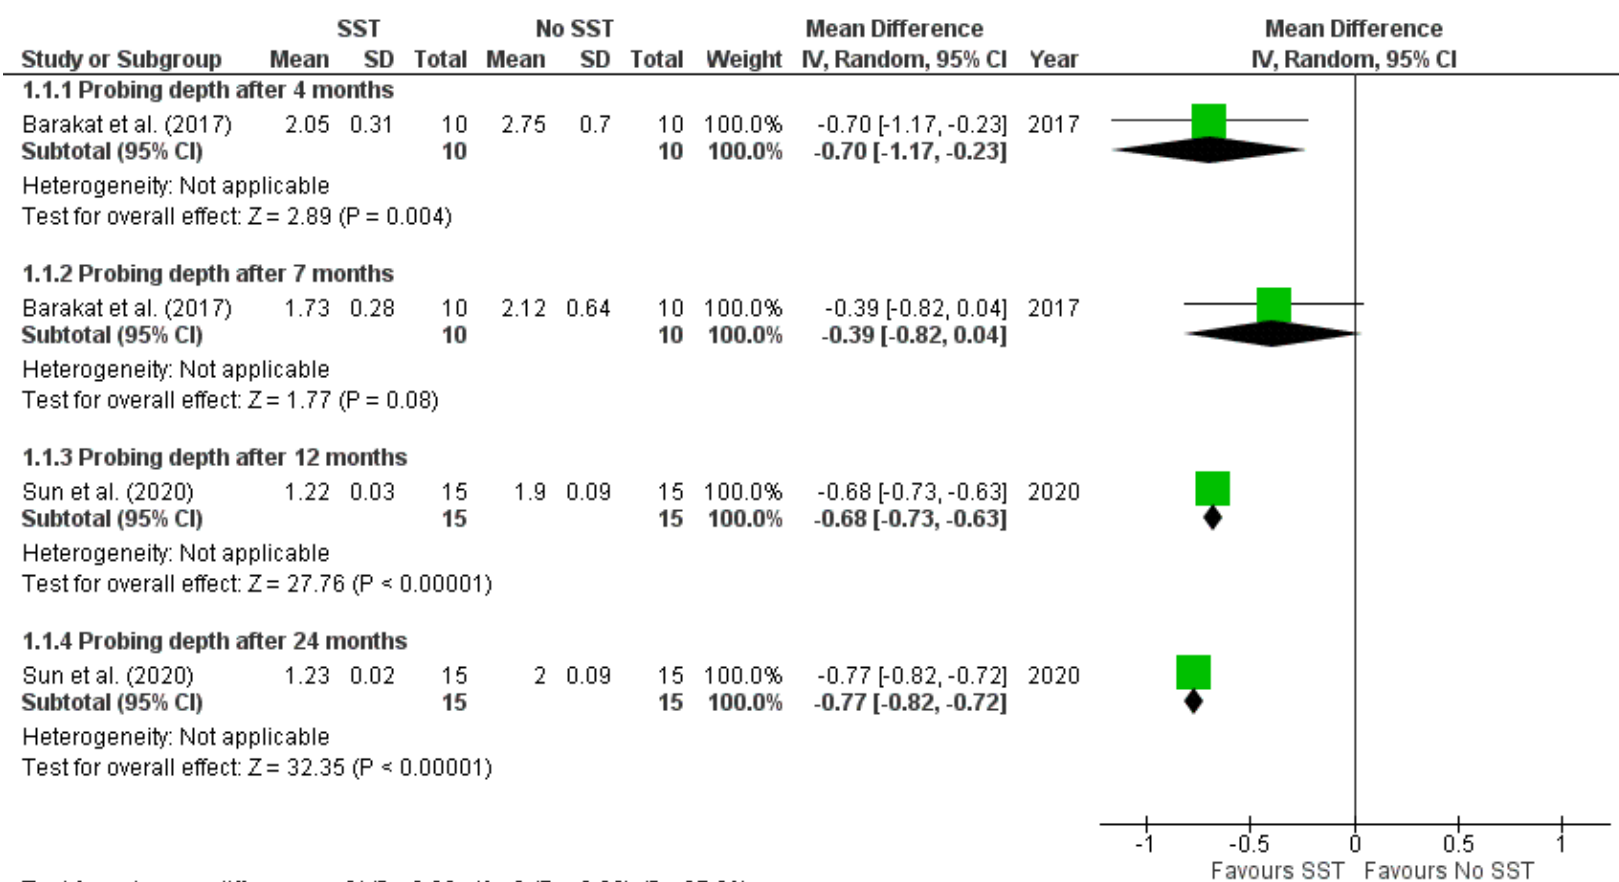

**Appendix Figure S6.** Sensitivity analysis measuring the probing depth at different follow-ups

## PRISMA 2020 Main Checklist

| Topic                          | No. | Item                                                                                                                                                                                                                                                                                                 | Location where item is reported |
|--------------------------------|-----|------------------------------------------------------------------------------------------------------------------------------------------------------------------------------------------------------------------------------------------------------------------------------------------------------|---------------------------------|
| <b>TITLE</b>                   |     |                                                                                                                                                                                                                                                                                                      |                                 |
| <b>Title</b>                   | 1   | Identify the report as a systematic review.                                                                                                                                                                                                                                                          | Section 1, Page 1               |
| <b>ABSTRACT</b>                |     |                                                                                                                                                                                                                                                                                                      |                                 |
| <b>Abstract</b>                | 2   | See the PRISMA 2020 for Abstracts checklist                                                                                                                                                                                                                                                          |                                 |
| <b>INTRODUCTION</b>            |     |                                                                                                                                                                                                                                                                                                      |                                 |
| <b>Rationale</b>               | 3   | Describe the rationale for the review in the context of existing knowledge.                                                                                                                                                                                                                          | Section 1, Line 46              |
| <b>Objectives</b>              | 4   | Provide an explicit statement of the objective(s) or question(s) the review addresses.                                                                                                                                                                                                               | Line 95-102                     |
| <b>METHODS</b>                 |     |                                                                                                                                                                                                                                                                                                      |                                 |
| <b>Eligibility criteria</b>    | 5   | Specify the inclusion and exclusion criteria for the review and how studies were grouped for the syntheses.                                                                                                                                                                                          | Line 110-132                    |
| <b>Information sources</b>     | 6   | Specify all databases, registers, websites, organisations, reference lists and other sources searched or consulted to identify studies. Specify the date when each source was last searched or consulted.                                                                                            | Line 135-142                    |
| <b>Search strategy</b>         | 7   | Present the full search strategies for all databases, registers and websites, including any filters and limits used.                                                                                                                                                                                 | Line 141-142                    |
| <b>Selection process</b>       | 8   | Specify the methods used to decide whether a study met the inclusion criteria of the review, including how many reviewers screened each record and each report retrieved, whether they worked independently, and if applicable, details of automation tools used in the process.                     | Line 143-147                    |
| <b>Data collection process</b> | 9   | Specify the methods used to collect data from reports, including how many reviewers collected data from each report, whether they worked independently, any processes for obtaining or confirming data from study investigators, and if applicable, details of automation tools used in the process. | Line 148-155                    |

| Topic                                | No. | Item                                                                                                                                                                                                                                                                          | Location where item is reported |
|--------------------------------------|-----|-------------------------------------------------------------------------------------------------------------------------------------------------------------------------------------------------------------------------------------------------------------------------------|---------------------------------|
| <b>Data items</b>                    | 10a | List and define all outcomes for which data were sought. Specify whether all results that were compatible with each outcome domain in each study were sought (e.g. for all measures, time points, analyses), and if not, the methods used to decide which results to collect. | Line 148-155                    |
|                                      | 10b | List and define all other variables for which data were sought (e.g. participant and intervention characteristics, funding sources). Describe any assumptions made about any missing or unclear information.                                                                  | Line 148-155                    |
| <b>Study risk of bias assessment</b> | 11  | Specify the methods used to assess risk of bias in the included studies, including details of the tool(s) used, how many reviewers assessed each study and whether they worked independently, and if applicable, details of automation tools used in the process.             | Line 156-166                    |
| <b>Effect measures</b>               | 12  | Specify for each outcome the effect measure(s) (e.g. risk ratio, mean difference) used in the synthesis or presentation of results.                                                                                                                                           | Line 168-175                    |
| <b>Synthesis methods</b>             | 13a | Describe the processes used to decide which studies were eligible for each synthesis (e.g. tabulating the study intervention characteristics and comparing against the planned groups for each synthesis (item 5)).                                                           | Line 176-192                    |
|                                      | 13b | Describe any methods required to prepare the data for presentation or synthesis, such as handling of missing summary statistics, or data conversions.                                                                                                                         | Line 182-188                    |
|                                      | 13c | Describe any methods used to tabulate or visually display results of individual studies and syntheses.                                                                                                                                                                        | Line 176-192                    |
|                                      | 13d | Describe any methods used to synthesize results and provide a rationale for the choice(s). If meta-analysis was performed, describe the model(s), method(s) to identify the presence and extent of statistical heterogeneity, and software package(s) used.                   | Line 176-192                    |
|                                      | 13e | Describe any methods used to explore possible causes of heterogeneity among study results (e.g. subgroup analysis, meta-regression).                                                                                                                                          | Line 173-175                    |
|                                      | 13f | Describe any sensitivity analyses conducted to assess robustness of the synthesized results.                                                                                                                                                                                  | Line 191-192                    |
| <b>Reporting bias assessment</b>     | 14  | Describe any methods used to assess risk of bias due to missing results in a synthesis (arising from reporting biases).                                                                                                                                                       | Line 191-192                    |
| <b>Certainty assessment</b>          | 15  | Describe any methods used to assess certainty (or confidence) in the body of evidence for an outcome.                                                                                                                                                                         | Line 193-202                    |

| Topic                                | No. | Item                                                                                                                                                                                                                                                                                 | Location where item is reported |
|--------------------------------------|-----|--------------------------------------------------------------------------------------------------------------------------------------------------------------------------------------------------------------------------------------------------------------------------------------|---------------------------------|
| <b>RESULTS</b>                       |     |                                                                                                                                                                                                                                                                                      |                                 |
| <b>Study selection</b>               | 16a | Describe the results of the search and selection process, from the number of records identified in the search to the number of studies included in the review, ideally using a flow diagram.                                                                                         | Line 206-212                    |
|                                      | 16b | Cite studies that might appear to meet the inclusion criteria, but which were excluded, and explain why they were excluded.                                                                                                                                                          | Line 210-212                    |
| <b>Study characteristics</b>         | 17  | Cite each included study and present its characteristics.                                                                                                                                                                                                                            | Line 214-239                    |
| <b>Risk of bias in studies</b>       | 18  | Present assessments of risk of bias for each included study.                                                                                                                                                                                                                         | Line 241-250                    |
| <b>Results of individual studies</b> | 19  | For all outcomes, present, for each study: (a) summary statistics for each group (where appropriate) and (b) an effect estimate and its precision (e.g. confidence/credible interval), ideally using structured tables or plots.                                                     | Line 309-313                    |
| <b>Results of syntheses</b>          | 20a | For each synthesis, briefly summarise the characteristics and risk of bias among contributing studies.                                                                                                                                                                               | Line 314-389                    |
|                                      | 20b | Present results of all statistical syntheses conducted. If meta-analysis was done, present for each the summary estimate and its precision (e.g. confidence/credible interval) and measures of statistical heterogeneity. If comparing groups, describe the direction of the effect. | Line 314-389                    |
|                                      | 20c | Present results of all investigations of possible causes of heterogeneity among study results.                                                                                                                                                                                       | Line 391-396                    |
|                                      | 20d | Present results of all sensitivity analyses conducted to assess the robustness of the synthesized results.                                                                                                                                                                           | Line 391-396                    |
| <b>Reporting biases</b>              | 21  | Present assessments of risk of bias due to missing results (arising from reporting biases) for each synthesis assessed.                                                                                                                                                              | NA                              |
| <b>Certainty of evidence</b>         | 22  | Present assessments of certainty (or confidence) in the body of evidence for each outcome assessed.                                                                                                                                                                                  | Line 397-400                    |
| <b>DISCUSSION</b>                    |     |                                                                                                                                                                                                                                                                                      |                                 |
| <b>Discussion</b>                    | 23a | Provide a general interpretation of the results in the context of other evidence.                                                                                                                                                                                                    | Line 413-442                    |
|                                      | 23b | Discuss any limitations of the evidence included in the review.                                                                                                                                                                                                                      | Line 484-512                    |

| Topic                                                 | No. | Item                                                                                                                                                                                                                                       | Location where item is reported |
|-------------------------------------------------------|-----|--------------------------------------------------------------------------------------------------------------------------------------------------------------------------------------------------------------------------------------------|---------------------------------|
|                                                       | 23c | Discuss any limitations of the review processes used.                                                                                                                                                                                      | Line 484-512                    |
|                                                       | 23d | Discuss implications of the results for practice, policy, and future research.                                                                                                                                                             | Line 513-520                    |
| <b>OTHER INFORMATION</b>                              |     |                                                                                                                                                                                                                                            |                                 |
| <b>Registration and protocol</b>                      | 24a | Provide registration information for the review, including register name and registration number, or state that the review was not registered.                                                                                             | NA                              |
|                                                       | 24b | Indicate where the review protocol can be accessed, or state that a protocol was not prepared.                                                                                                                                             | NA                              |
|                                                       | 24c | Describe and explain any amendments to information provided at registration or in the protocol.                                                                                                                                            | NA                              |
| <b>Support</b>                                        | 25  | Describe sources of financial or non-financial support for the review, and the role of the funders or sponsors in the review.                                                                                                              | Line 526                        |
| <b>Competing interests</b>                            | 26  | Declare any competing interests of review authors.                                                                                                                                                                                         | Line 528                        |
| <b>Availability of data, code and other materials</b> | 27  | Report which of the following are publicly available and where they can be found: template data collection forms; data extracted from included studies; data used for all analyses; analytic code; any other materials used in the review. | Line 529-530                    |

From: Page MJ, McKenzie JE, Bossuyt PM, Boutron I, Hoffmann TC, Mulrow CD, et al. The PRISMA 2020 statement: an updated guideline for reporting systematic reviews. MetaArXiv. 2020, September 14. DOI: 10.31222/osf.io/v7gm2. For more information, visit: [www.prisma-statement.org](http://www.prisma-statement.org)
